# Supplementary material for: Local Orientation and the Evolution of Foraging: Changes in Decision Making Can Eliminate Evolutionary Trade-offs
Source: PubMed Central journal article supplement (PMC3188503; doi:10.1371/journal.pcbi.1002186), 2011-10-06
Supplement: pcbi.1002186.s007.pdf [file pcbi.1002186.s007.pdf]

Table S1: Evolved parameter values

|           | Model 1              |                         | Model 2                 |                         |
|-----------|----------------------|-------------------------|-------------------------|-------------------------|
|           | Patchy               | Uniform                 | Patchy                  | Uniform                 |
| $p_M$     | 0.0 (0.0)            | 0.0 (0.001)             | <b>0.209 (0.086)</b>    | 0.001 (0.007)           |
| $t_M$     | 10 (0.01)            | 10 (0.0)                | 10 (0.0)                | 10 (0.0)                |
| $d_M$     | <b>0.99 (0.002)</b>  | <b>1.567 (0.156)</b>    | <b>4.681 (0.353)</b>    | <b>2.125 (0.099)</b>    |
| $a_M$     | 0.001 (0.182)        | 0.021 (0.182)           | <b>2.756 (16.108)</b>   | 0.295 (9.686)           |
| $p_S$     | <b>0.251 (0.019)</b> | 0.001 (0.004)           | -                       | -                       |
| $p_{SE}$  | -                    | -                       | <b>1.506 (0.333)</b>    | <b>1.486 (0.429)</b>    |
| $p_{SN}$  | -                    | -                       | 0.001 (0.005)           | 0.0 (0.001)             |
| $t_F$     | 10 (0.0)             | 10 (0.0)                | 10 (0.0)                | 10 (0.0)                |
| $d_F$     | 2.029 (0.019)        | 2.115 (0.06)            | 2.061 (0.069)           | 2.097 (0.102)           |
| $a_F$     | <b>356.52 (4.11)</b> | <b>248.434 (17.626)</b> | <b>264.423 (15.704)</b> | <b>253.181 (23.644)</b> |
| $p_{MTF}$ | 1                    | 1                       | 1.549 (0.428)           | 1.601 (0.352)           |
