# Supplementary material for: Local Orientation and the Evolution of Foraging: Changes in Decision Making Can Eliminate Evolutionary Trade-offs
Source: PLOS journal article supplement (doi:10.1371/journal.pcbi.1002186), 2011-10-06
Supplement: S8 (10.1371/journal.pcbi.1002186.s008) [file journal.pcbi.1002186.s008]

301 Moved Permanently

# Moved Permanently

The document has moved here.

---

Apache Server at www.ploscompbiol.org Port 80
